# Supplementary material for: The PHD Transcription Factor Rum1 Regulates Morphogenesis and Aflatoxin Biosynthesis in Aspergillus flavus
Source: Toxins (Basel). 2018 Jul 20;10(7):301. doi: 10.3390/toxins10070301 (PMC6070901; doi:10.3390/toxins10070301)
Supplement: Supplementary file 1 [file toxins-10-00301-s001.pdf]

# Supplementary Materials: The PHD Transcription Factor Rum1 Regulates Morphogenesis and Aflatoxin Biosynthesis in *Aspergillus flavus*

Yule Hu, Guang Yang, Danping Zhang, Yaju Liu, Yu Li, Guanglan Lin, Zhiqiang Guo, Shihua Wang and Zhenhong Zhuang

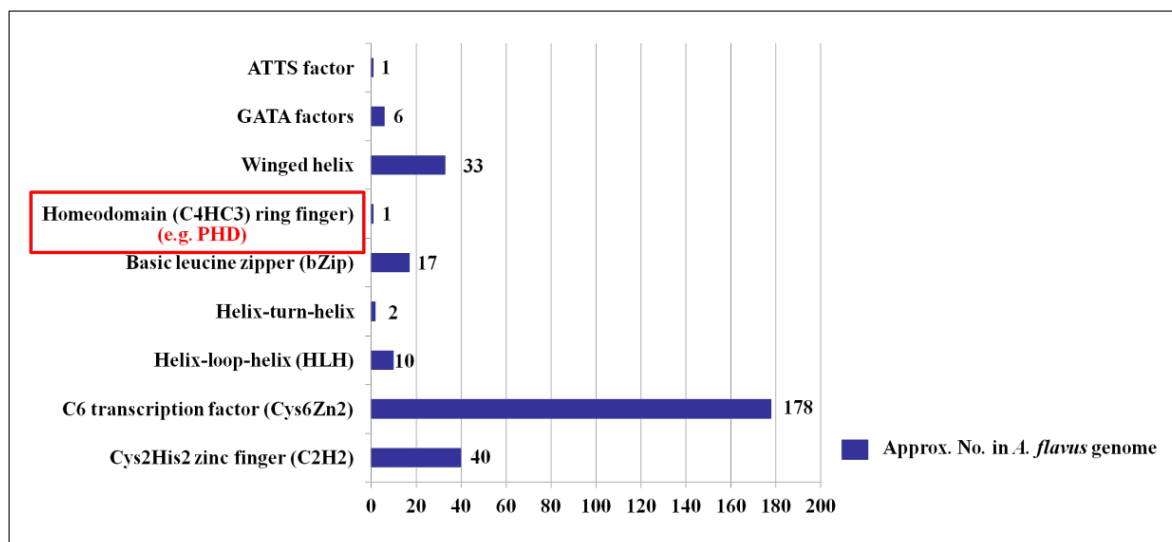

**Figure S1.** Classes of transcriptional factors in *A. flavus* [15]. Example of Homeodomain (C4HC3) ring finger: PHD.

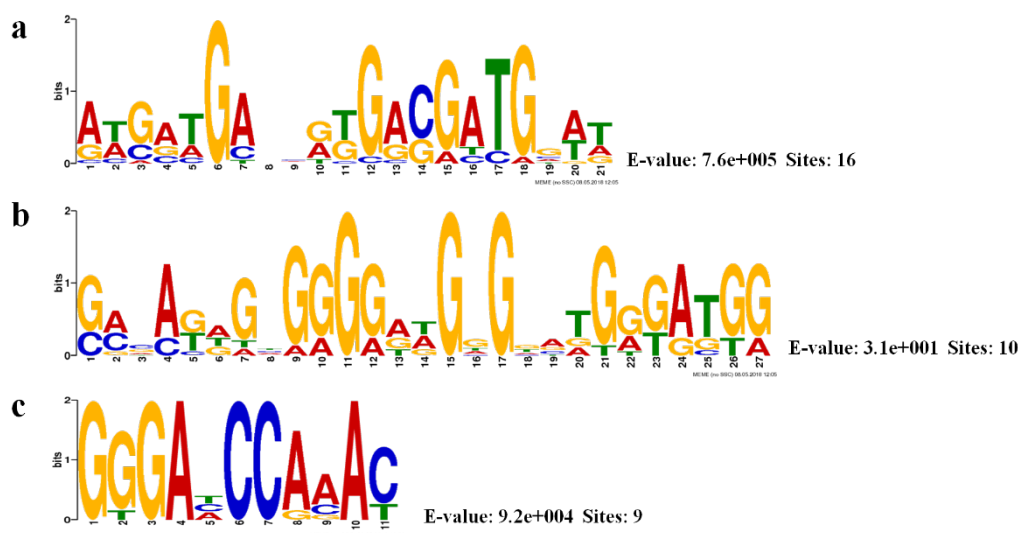

**Figure S2.** Predicted RE of Rum1 in transcriptional factor genes of *A. flavus*. (genes including: AFLA\_139360 *aflR* [*Aspergillus flavus* NRRL3357], AFLA\_139340 *aflS* [*Aspergillus flavus* NRRL3357], AFLA\_139410 *aflC* [*Aspergillus flavus* NRRL3357], AFLA\_139220 *aflO* [*Aspergillus flavus* NRRL3357], AFLA\_082850 *brlA* [*Aspergillus flavus* NRRL3357], AFLA\_029620 *abaA* [*Aspergillus flavus* NRRL3357], AFLA\_020210 *nsdD* [*Aspergillus flavus* NRRL3357]. MEME website address: <http://meme-suite.org/tools/meme>. **(a)** E-value: 7.6e+005, Sites: 16. **(b)** E-value: 3.1e+001, Sites: 10. **(c)** E-value: 9.2e+004, Sites: 9.

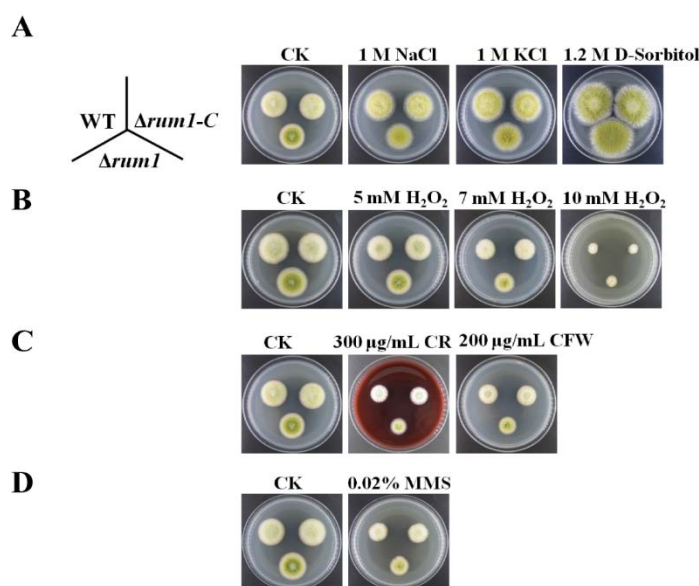

**Figure S3.** Growth of WT,  $\Delta rum1$  and  $\Delta rum1-C$  strains under multiple stresses. (A) Phenotype of WT,  $\Delta rum1$  and  $\Delta rum1-C$  strains under hyperosmotic stress (1 M NaCl, KCl, and 1.2 M D-Sorbitol); (B) Morphology of different strains under oxidative stress (5–10 mM  $H_2O_2$ ); (C) Colony phenotype of different strains cell wall stress (300  $\mu g/mL$  CR and 200  $\mu g/mL$  CFW); (D) Phenotype of different strains under DNA damaging agent stress (0.02% MMS).

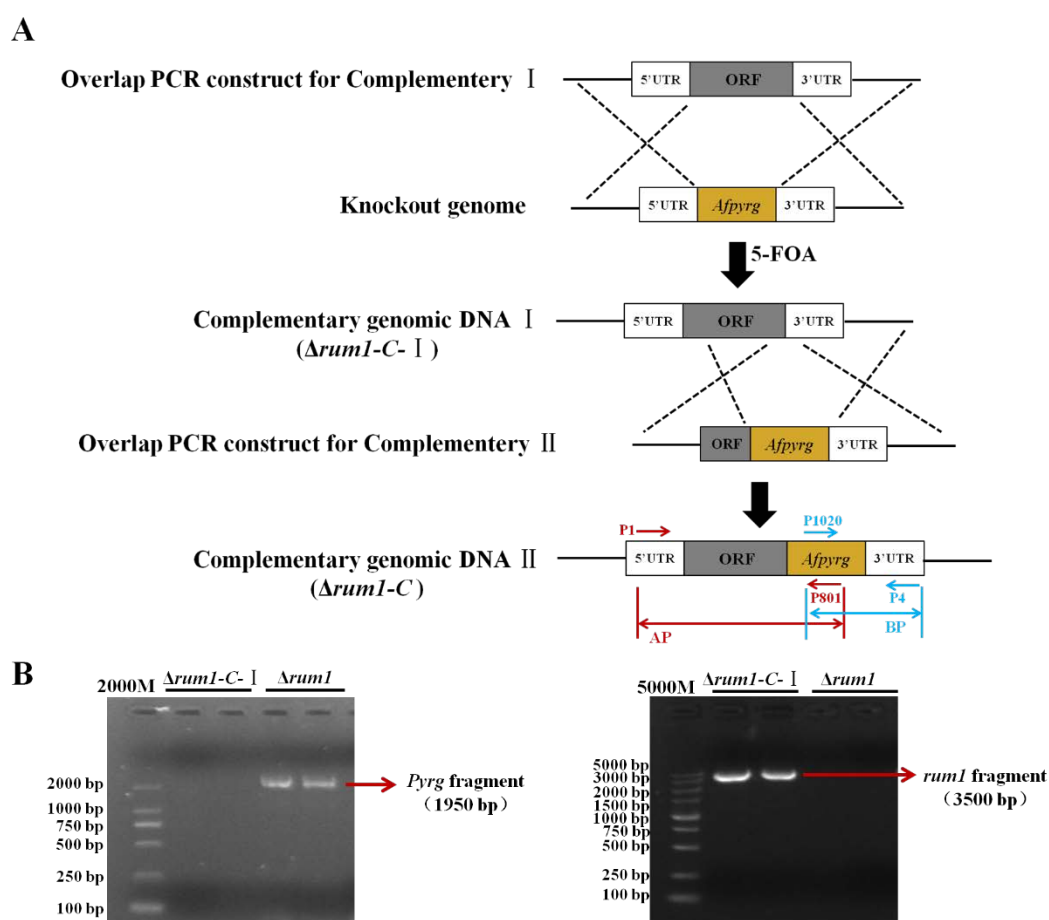

**Figure S4.** Strategy and confirmation of the complemented strain. (A) The scheme for *rum1* complement strategy. (B) PCR analysis was performed to confirm *rum1* complemented strains in the first step. (“ $\Delta rum1-C- I$ ” represents the first step of complemented strain, “ $\Delta rum1$ ” represents *rum1*).

gene knockout mutant. *Pyrg* fragment was confirmed by primers *rum1*-p5 and *rum1*-p6. *rum1* fragment was confirmed by primers *rum1*-p9 and *rum1*-p10. Two lanes of the same strain represent two repeats, respectively).
